# Supplementary material for: Theoretical investigation of an ultrastable one dimensional infinite monatomic mixed valent gold wire with excellent electronic properties
Source: Royal Society of Chemistry journal article supplement (doi:10.1039/c6cp00787b), 2016-01-01
Supplement: c6cp00787b1.pdf [file c6cp00787b1.pdf]

### Supplementary Information

Chun Zhu<sup>1\*</sup>, Jin-Xia Liang<sup>2,\*</sup>

<sup>1</sup>School of Chemistry and Chemical Engineering, Guizhou University, Guizhou 550025, China

<sup>2</sup>Guizhou Provincial Key Laboratory of Computational Nano-Material Science, Guizhou Synergetic Innovation Center of Scientific Big Data for Advanced Manufacturing Technology, Guizhou Normal College, Guiyang, 550018, China

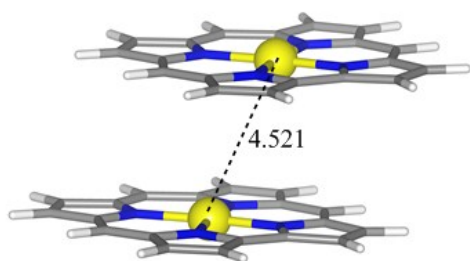

**Figure S1.** Optimized structures of  $\text{Au}_2(\text{Au-cor})_2$ .

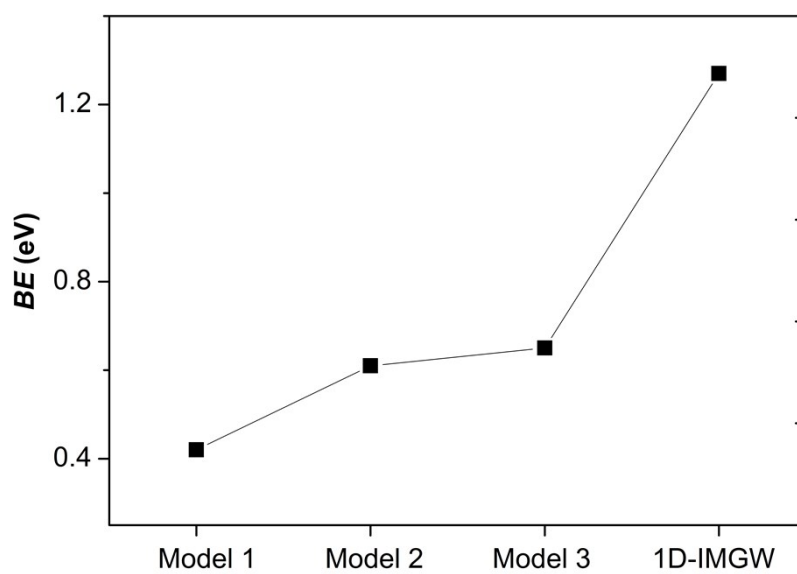

**Figure S2.** Binding energies (*BE*) four **Model 1**, **Model 2**, **Model 3** and 1D-1MGW.

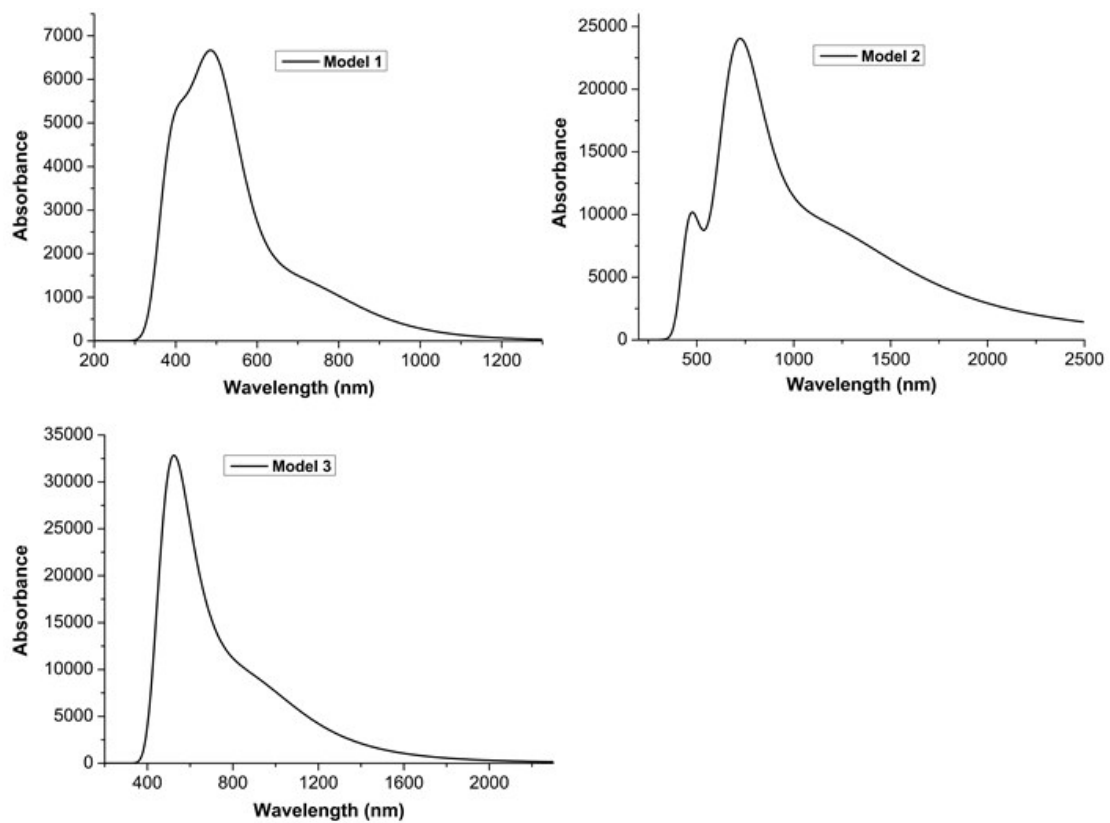

**Figure S3.** Predicted UV-Vis spectra of **Model 1**, **Model 2** and **Model 3**.

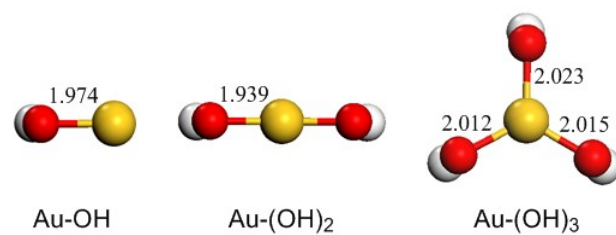

**Figure S4.** The Au-OH, Au-(OH)<sub>2</sub> and Au-(OH)<sub>3</sub> molecules are calculated in a cubic box of 20\*20\*20 Å.  
Copyright from ref. 54

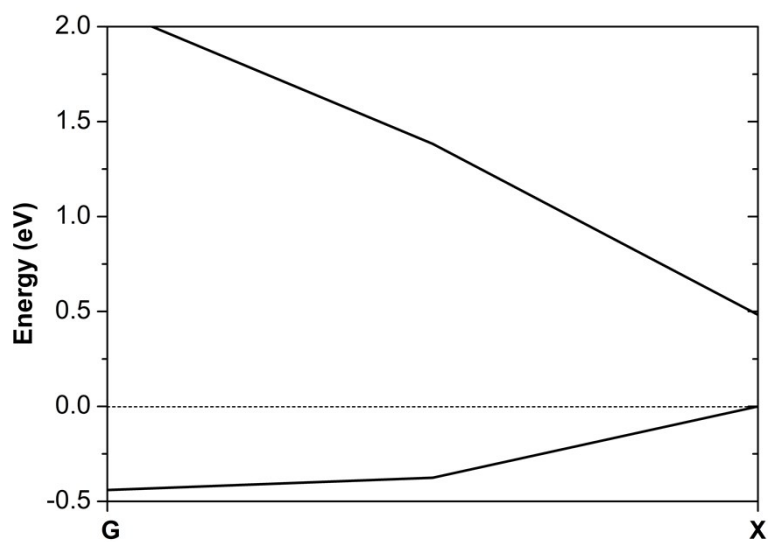

**Figure S5.** The calculated band structure of the 1D-IMGW by PBE0 hybrid density functional. The Fermi level is set at zero

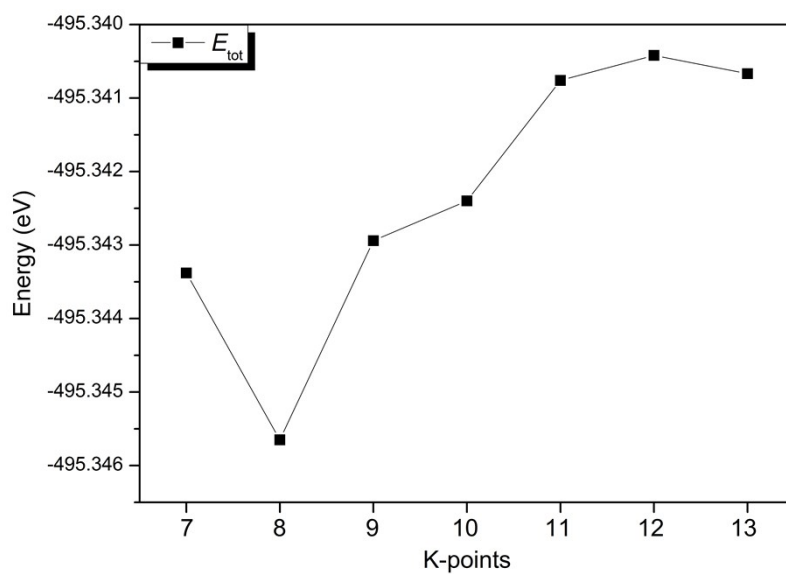

**Figure S6.** The calculated total energies of the 1D-IMGW using different k-points 7x1x1, 8x1x1, 9x1x1, 10x1x1, 11x1x1, 12x1x1, and 13x1x1 respectively.

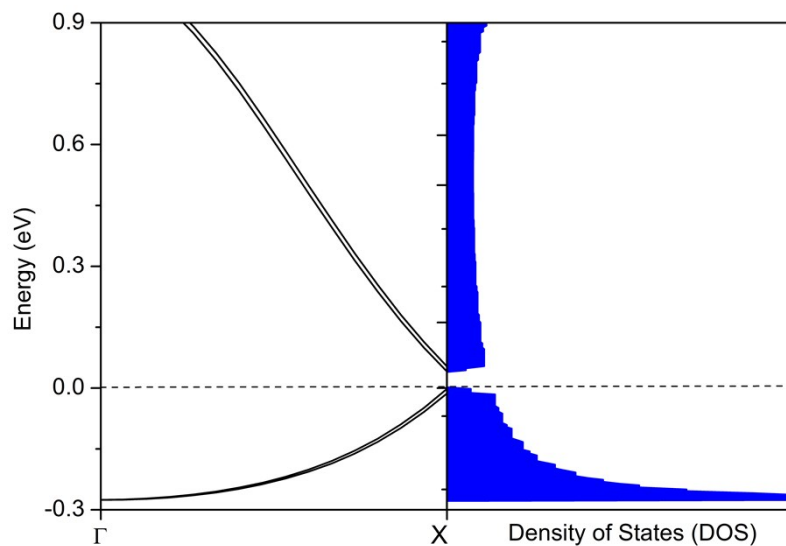

**Figure S7.** The enlarged band structure (left) and density of states (right) of the 1D-IMGW calculated by PBE. The Fermi level is set at zero.

**Table S1.** The calculated bond lengths of Au-Au ( $D_{\text{Au-Au}}$ ) in **Model 1** using different density functional theory (DFT) of B3LYP, CAM-B3LYP, BP86 and PBE.

| DFT                | B3LYP | CAM-B3LYP | BP86  | PBE   |
|--------------------|-------|-----------|-------|-------|
| $D_{\text{Au-Au}}$ | 3.102 | 3.067     | 2.940 | 2.941 |

**Table S2.** Bader charges for Au atoms in the center of corrole rings ( $\text{Au}_c$ ) and between the corrole rings ( $\text{Au}_i$ ) and Au-OH, Au-(OH)<sub>2</sub> and Au-(OH)<sub>3</sub> molecules in the cubic box of 20\*20\*20 Å.

| Species              | Au-O Bond length (Å) | Au Valence electron | Au Bader charge (e) |
|----------------------|----------------------|---------------------|---------------------|
| $\text{Au}_c$        | ---                  | 10.033              | 0.967               |
|                      |                      | 10.051              | 0.949               |
| $\text{Au}_i$        | ---                  | 11.131              | -0.131              |
|                      |                      | 11.141              | -0.141              |
| Au-OH                | 1.974                | 10.681              | 0.319               |
| Au-(OH) <sub>2</sub> | 1.939                | 10.412              | 0.588               |
| Au-(OH) <sub>3</sub> | 2.012, 2.023, 2.015  | 10.079              | 0.921               |

ECP Valence electrons used in the calculations: Au ( $d^{10}s^1$ ). Copyright from ref. 54
